# Supplementary material
Source: Elsevier journal article supplement (https://rcastoragev2.blob.core.windows.net/89bb1b3f383bf305f28f29b60f88ea55/mmc1.pdf)
Supplement: mmc1 [file mmc1.pdf]

# THE LANCET

## Public Health

### **Supplementary appendix**

This appendix formed part of the original submission and has been peer reviewed.  
We post it as supplied by the authors.

Supplement to: Xia C, Basu P, Kramer BS, et al. Cancer screening in China: a steep road from evidence to implementation. *Lancet Public Health* 2023; published online Nov 21. [https://doi.org/10.1016/S2468-2667\(23\)00186-X](https://doi.org/10.1016/S2468-2667(23)00186-X).

## Supplementary Appendix

Authors: Changfa Xia, Partha Basu, Barnett S Kramer, He Li, Chunfeng Qu, Xue Qin Yu, Karen Canfell, Youlin Qiao, Bruce K Armstrong, Wanqing Chen

### Table of Contents

|                                                                                                     |   |
|-----------------------------------------------------------------------------------------------------|---|
| Figure S1: Location of High Incidence Fields for cancer prevention in China in 1970s to 1990s ..... | 1 |
| Table S1: High Incidence Fields for cancer prevention in China in 1970s to 1990s .....              | 1 |
| Table S2: Cancer screening programmes funded by local government in China.....                      | 2 |
| Table S3: Key advances on cancer screening tests in China.....                                      | 3 |

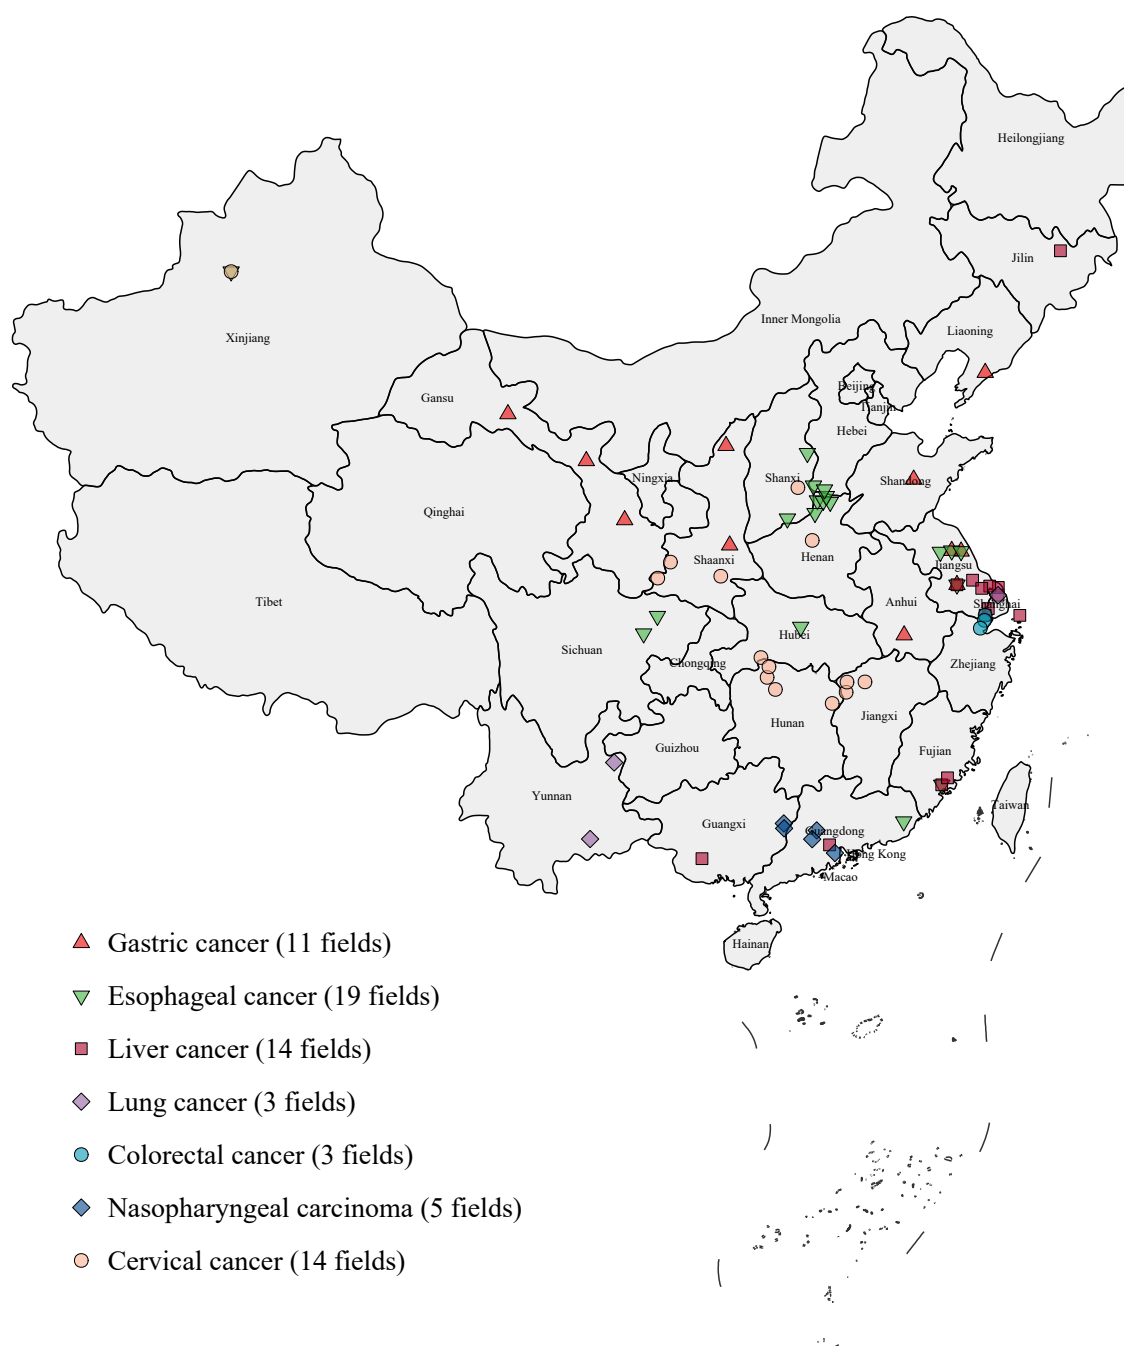

**Figure S1: Location of High Incidence Fields for cancer prevention in China in 1970s to 1990s<sup>1,2</sup>**

**Table S1: High Incidence Fields for cancer prevention in China in 1970s to 1990s<sup>1,2</sup>**

| Cancer types                        | High Incidence Fields                                                                                                                                                      |
|-------------------------------------|----------------------------------------------------------------------------------------------------------------------------------------------------------------------------|
| Gastric cancer (11 fields)          | Anqing, Dingxi, Jianhu, Jiuquan, Linqu, Weinan, Wuwei, Yancheng, Yangzhong, Yulin, Zhuanghe                                                                                |
| Esophageal cancer (19 fields)       | Anyang, Cangxi, Cixian, Hebi, Huai'an, Huixian, Jianhu, Jieyang, Linxian, Shexian, Tangyin, Tongan, Xinyuan, Yancheng, Yangcheng, Yangquan, Yangzhong, Yanting, Zhongxiang |
| Liver cancer (14 fields)            | Chongming, Dunhua, Fusui, Haimen, Jiashan, Nan'an, Nantong, Qidong, Qingpu, Rugao, Shengsi, Shunde, Tongan, Yangzhong                                                      |
| Lung cancer (3 fields)              | Chongming, Gejiu, Xuanwei                                                                                                                                                  |
| Colorectal cancer (3 fields)        | Haining, Jiashan, Jiaxing                                                                                                                                                  |
| Nasopharyngeal carcinoma (5 fields) | Cangwu, Sihui, Wuzhou, Zhaoqing, Zhongshan                                                                                                                                 |
| Cervical cancer (14 fields)         | Cili, Fengxian, Jing'an, Liuyang, Lueyang, Shimen, Taoyuan, Tonghui, Wufeng, Xiangyuan, Xinmi, Xinyuan, Xiushui, Zhen'an                                                   |

**Table S2: Cancer screening programmes funded by local government in China\***

| Province  | Programme                                                                              | Cities or counties covered                                                                                                                                                                                                                                                                           | Target cancer sites                             | Initiation year |
|-----------|----------------------------------------------------------------------------------------|------------------------------------------------------------------------------------------------------------------------------------------------------------------------------------------------------------------------------------------------------------------------------------------------------|-------------------------------------------------|-----------------|
| Tianjin   | Colorectal Cancer Screening Programme <sup>3,6</sup>                                   | All 16 districts in Tianjin Municipality                                                                                                                                                                                                                                                             | Colorectum                                      | 2012            |
| Tianjin   | Joint Screening Programmes for Common Cancers <sup>7,8</sup>                           | Seven districts in Tianjin Municipality: Heping, Nankai, Hexi, Hedong, Hebei, Hongqiao, and Jizhou                                                                                                                                                                                                   | Lung, breast, stomach, and liver                | 2017            |
| Liaoning  | Livelihood Programme for Colorectal Cancer Screening <sup>9</sup>                      | Eight cities: Shenyang, Fushun, Benxi, Dandong, Yingkou, Panjin, Liaoyang, and Tieling                                                                                                                                                                                                               | Colorectum                                      | 2021            |
| Shanghai  | Community-Based Colorectal Cancer Screening Programme <sup>10,11</sup>                 | All districts and counties in Shanghai Municipality                                                                                                                                                                                                                                                  | Colorectum                                      | 2012            |
| Jiangsu   | Colorectal Cancer Screening Programme <sup>12</sup>                                    | 10 regions in Jiangsu Province: Jintan District of Changzhou City, Kunshan City of Suzhou, Rudong County of Nantong, Ganyu District and Guanyun County of Lianyungang, Xuyi County of Huai'an, Yandu District of Yancheng, Baoying County of Yangzhou, Jiangyan District and Xinghua City of Taizhou | Colorectum                                      | 2020            |
| Jiangsu   | Comprehensive Cancer Screening Programme <sup>13,14</sup>                              | 25 cities and counties in Jiangsu Province                                                                                                                                                                                                                                                           | Lung, liver, stomach, esophagus, and colorectum | 2019            |
| Jiangsu   | Livelihood Project for Colorectal Cancer Screening <sup>15,16</sup>                    | Hanjiang District of Yangzhou City                                                                                                                                                                                                                                                                   | Colorectum                                      | 2021            |
| Zhejiang  | Colorectal Cancer Screening Program <sup>17,18</sup>                                   | All 90 districts and counties in Zhejiang Province                                                                                                                                                                                                                                                   | Colorectum                                      | 2020            |
| Zhejiang  | Gastric Cancer Screening Programme among low-income population <sup>19,20</sup>        | Taizhou City                                                                                                                                                                                                                                                                                         | Stomach                                         | 2019            |
| Zhejiang  | Lung Cancer Screening Programme <sup>21</sup>                                          | Wenling City of Taizhou                                                                                                                                                                                                                                                                              | Lung                                            | 2019            |
| Zhejiang  | Gastric Cancer Screening Programme among low-income population <sup>22</sup>           | Lishui City                                                                                                                                                                                                                                                                                          | Stomach                                         | 2019            |
| Zhejiang  | Lung Cancer Screening Programme <sup>23</sup>                                          | Lishui City                                                                                                                                                                                                                                                                                          | Lung                                            | 2023            |
| Zhejiang  | Colorectal Cancer Screening Programme among urban and rural residents <sup>24,25</sup> | Lanxi City of Jinhua                                                                                                                                                                                                                                                                                 | Colorectum                                      | 2018            |
| Zhejiang  | Gastrointestinal Cancer Screening Programme <sup>26</sup>                              | Yongkang City of Jinhua                                                                                                                                                                                                                                                                              | Esophagus, stomach, and colorectum              | 2019            |
| Zhejiang  | Gastrointestinal Cancer Screening Programme <sup>27,28</sup>                           | Fenghua District of Ningbo City                                                                                                                                                                                                                                                                      | Esophagus, stomach, and colorectum              | 2023            |
| Shandong  | Five Cancer Screening Programme upon employee medical insurance <sup>29,30</sup>       | Jinan City                                                                                                                                                                                                                                                                                           | Lung, esophagus, stomach, colon, and rectum     | 2019            |
| Shandong  | Colorectal Cancer Screening Programme among local residents <sup>31</sup>              | Weifang City                                                                                                                                                                                                                                                                                         | Colorectum                                      | 2021            |
| Shandong  | Gastric Cancer Screening Programme among rural residents <sup>32</sup>                 | Weihai City                                                                                                                                                                                                                                                                                          | Stomach                                         | 2021            |
| Shandong  | Common Cancer Screening Programme upon employee medical insurance <sup>33</sup>        | Binzhou City                                                                                                                                                                                                                                                                                         | Lung, esophagus, stomach, colon, and rectum     | 2020            |
| Hubei     | Free Screening Programme for Colorectal Cancer <sup>34</sup>                           | Wuhan City                                                                                                                                                                                                                                                                                           | Colorectum                                      | 2021            |
| Hubei     | Free Screening Programme for Lung Cancer <sup>35</sup>                                 | Six cities: Yichang, Enshi, Huangshi, Ezhou, Jingzhou, and Huanggang                                                                                                                                                                                                                                 | Lung                                            | 2023            |
| Hunan     | Lung Cancer Screening Programme <sup>36,37</sup>                                       | Seven cities: Zhuzhou, Hengyang, Shaoyang, Changde, Chenzhou, Loudi, and Huaihua                                                                                                                                                                                                                     | Lung                                            | 2021            |
| Hunan     | Colorectal Cancer Screening Programme <sup>38,39</sup>                                 | 14 cities and municipalities in Hunan Province                                                                                                                                                                                                                                                       | Colorectum                                      | 2022            |
| Guangdong | Colorectal Cancer Screening Programme in community population <sup>40,42</sup>         | Guangzhou City                                                                                                                                                                                                                                                                                       | Colorectum                                      | 2015            |
| Guangdong | Pilot Screening Programme for High-Risk Populations of Lung Cancer <sup>43</sup>       | Yuexiu District of Guangzhou City                                                                                                                                                                                                                                                                    | Lung                                            | 2017            |
| Guangdong | Colorectal Cancer Screening Programme in community population <sup>44,45</sup>         | Shenzhen City                                                                                                                                                                                                                                                                                        | Colorectum                                      | 2020            |
| Guangxi   | Nasopharyngeal Carcinoma and Liver Cancer Screening Programme <sup>46,47</sup>         | 22 counties, cities, and districts: six urban areas of Nanning City, three urban areas of Guigang, Jiangzhou District of Chongzuo, and counties of Fushui, Binyang, Long'an, Hepu, Guiping, Pingnan, Tianyang, Tiandong, Cangwu, Cenxi, Bobai, and Luchuan                                           | Nasopharynx and liver                           | 2013            |

\* Local government sponsored cervical cancer and breast cancer screening programmes were not included, because these programmes are considered as the components of the nationwide Cervical Cancer and Breast Cancer Screening Programmes for Women.

**Table S3: Key advances on cancer screening tests in China**

| Study                                                                   | Study design                                            | Key outcomes                                                                                                                                                |
|-------------------------------------------------------------------------|---------------------------------------------------------|-------------------------------------------------------------------------------------------------------------------------------------------------------------|
| <b>Lung cancer</b>                                                      |                                                         |                                                                                                                                                             |
| Li et al (2022) <sup>48</sup>                                           | Real-world study; cohort study                          | One-off low-dose CT screening reduces mortality from lung cancer and all-cause                                                                              |
| Dai et al (2019) <sup>49</sup> and Qin et al (2022) <sup>50</sup>       | Cohort study                                            | Polygenic risk scores (PRS) and mosaic chromosomal alterations can identify subpopulations at high risk of lung cancer                                      |
| Jin et al (2001) <sup>51</sup> and Fan et al (2009) <sup>52</sup>       | Cohort study                                            | Sputum atypia is an effective method for lung cancer screening among occupational high-risk population                                                      |
| <b>Liver cancer</b>                                                     |                                                         |                                                                                                                                                             |
| Zeng et al (2023) <sup>53</sup>                                         | Cohort study                                            | Annually alpha-fetoprotein (AFP) test combined with ultrasound improves survival of individuals with HBsAg seropositivity                                   |
| Wu et al (2016) <sup>54</sup>                                           | Cohort study                                            | Shorter ultrasound screening intervals are associated with reduced overall mortality in hepatocellular carcinoma (HCC) patients in a dose-dependent manner  |
| Zhang et al (2004) <sup>55</sup>                                        | RCT                                                     | AFP test and ultrasound examination every 6 months reduce HCC mortality by 37%                                                                              |
| Zhu et al (1981) <sup>56</sup>                                          | Real-world study; diagnostic study                      | AFP test is an effective method for liver cancer screening                                                                                                  |
| <b>Colorectal cancer</b>                                                |                                                         |                                                                                                                                                             |
| Chen et al (2022) <sup>57</sup>                                         | RCT                                                     | Risk-adapted approach is a feasible and cost-favourable strategy for colorectal screening                                                                   |
| Wang et al (2019) <sup>58</sup> and Wang et al (2021) <sup>59</sup>     | RCT                                                     | Computer-aided detection system increase adenomas detection rates during colonoscopy                                                                        |
| Zheng et al (2003) <sup>60</sup>                                        | RCT                                                     | Fecal occult blood test reduce mortality form rectal cancer but not reduce mortality form colon cancer                                                      |
| <b>Esophageal and gastric cancer</b>                                    |                                                         |                                                                                                                                                             |
| Chen et al (2021) <sup>61</sup>                                         | Real-world study; cohort study                          | One-time endoscopic screening reduces upper gastrointestinal cancer incidence and mortality in high-risk areas                                              |
| Jin et al (2020) <sup>62</sup>                                          | Cohort study                                            | Polygenic risk scores (PRS) can identify Chinese individuals at high risk of gastric cancer                                                                 |
| Luo et al (2019) <sup>63</sup>                                          | Case-control study; diagnostic study                    | Artificial intelligence system achieved high diagnostic accuracy in detecting upper gastrointestinal cancer lesions                                         |
| Wei et al (2015) <sup>64</sup>                                          | Community-based cluster non-randomised controlled trial | One-time endoscopic screening reduces mortality from esophageal cancer in high-risk areas                                                                   |
| Liu et al (1994) <sup>65</sup> and Dawsey et al (1994) <sup>66</sup>    | Cohort study                                            | Esophageal balloon cytology can identify individuals at increased risk of esophagus cancer or gastric cancer                                                |
| <b>Breast cancer</b>                                                    |                                                         |                                                                                                                                                             |
| Shen et al (2015) <sup>67</sup>                                         | RCT                                                     | Ultrasound is superior to mammography for breast cancer screening in high-risk Chinese women                                                                |
| Thomas et al (1997) <sup>68</sup> and Thomas et al (2002) <sup>69</sup> | RCT                                                     | Intensive instruction in breast self-examination did not reduce mortality from breast cancer                                                                |
| <b>Cervical cancer</b>                                                  |                                                         |                                                                                                                                                             |
| Zhang et al (2021) <sup>70</sup>                                        | RCT                                                     | High-risk HPV testing is an effective primary screening method in primary health care centres                                                               |
| Pan et al (2013) <sup>71</sup>                                          | Pool of diagnostic studies                              | Liquid-based cytology (LBC) can effectively detect cervical intraepithelial neoplasia (CIN) grade 2 or worse                                                |
| Zhao et al (2012) <sup>72</sup>                                         | Pool of diagnostic studies                              | Self-sample HPV testing favourably with LBC and superior to visual inspection with acetic acid                                                              |
| Zhao et al (2010) <sup>73</sup>                                         | Pool of diagnostic studies                              | HPV DNA testing is highly sensitive and moderately specific to detect CIN grade 3 or worse                                                                  |
| Qiao et al (2008) <sup>74</sup>                                         | Diagnostic study                                        | A low-cost, less time-consuming, and low-tech alternative HPV DNA test (i.e., careHPV) was developed for cervical cancer screening in low-resource settings |
| <b>Nasopharyngeal carcinoma (NPC)</b>                                   |                                                         |                                                                                                                                                             |
| He et al (2022) <sup>75</sup>                                           | Case-control study; diagnostic study                    | Polygenic risk scores (PRS) with the Epstein-Barr virus (EBV) test improves NPC risk stratification                                                         |
| Ji et al (2019) <sup>76</sup>                                           | Cluster RCT                                             | Serum IgA antibodies against EBV can identify high-risk population of NPC                                                                                   |
| Chan et al (2017) <sup>77</sup>                                         | Cohort study                                            | Plasma EBV DNA is an effective method to detect early NPC and improves progression-free survival of NPC patients                                            |
| Huang et al (1997) <sup>78</sup> and Deng et al (2005) <sup>79</sup>    | Cohort study                                            | A screening strategy based on EBV serological tests was established for NPC                                                                                 |

AFP=Alpha-Fetoprotein. CIN=Cervical Intraepithelial Neoplasia. CT=Computed Tomography. EBV=Epstein-Barr Virus. FIT=Fecal Immunochemical Test. LBC=Liquid-Based Cytology. NPC=Nasopharyngeal Carcinoma. HBsAg=Hepatitis B surface Antigen. HCC=Hepatocellular Carcinoma. HPV=Human Papillomavirus. PRS=Polygenic Risk Scores. RCT=Randomised Controlled Trial.

## References

1. Dong Z, Qiao Y, Li L, et al. Progress in Cancer Research in China (Volume 8). Cancer Prevention and Treatment in High Incidence Fields in China. Beijing, China: Peking University Medical Press; 2007.
2. Dong Z, Qiao Y, Li L, et al. A Report of Cancer High Incidence Scene in China. *China Cancer* 2009; **18**(1): 4-9 (in Chinese).
3. Zhao L, Zhang X, Chen Y, Wang Y, Zhang W, Lu W. Does self-reported symptom questionnaire play a role in nonadherence to colonoscopy for risk-increased population in the Tianjin colorectal cancer screening programme? *BMC Gastroenterol* 2021; **21**(1): 117.
4. Zhao L, Zhang W, Ma D, et al. Analysis of colorectal cancer screening practices in the general population of Tianjin. *Chin J Clin Oncol* 2015; **42**(15): 760-4 (in Chinese).
5. Tianjin Municipal Health Commission. Colorectal Cancer Screening Programme in Tianjin. 2019. [https://wsjk.tj.gov.cn/XWZX6600/MTBD3030/202008/t20200828\\_3586250.html](https://wsjk.tj.gov.cn/XWZX6600/MTBD3030/202008/t20200828_3586250.html) (accessed June 15, 2023).
6. Tianjin Municipal People's Government. Colorectal Cancer Screening Programme in Tianjin. 2022. [https://www.tj.gov.cn/sy/tjxw/202204/t20220424\\_5865170.html](https://www.tj.gov.cn/sy/tjxw/202204/t20220424_5865170.html) (accessed June 15, 2023).
7. Tianjin Municipal People's Government. Joint Screening Programmes for Common Cancers in Tianjin. 2021. [https://www.tj.gov.cn/sy/tjxw/202108/t20210806\\_5526832.html](https://www.tj.gov.cn/sy/tjxw/202108/t20210806_5526832.html) (accessed June 15, 2023).
8. Tianjin Municipal People's Government. Joint Screening Programmes for Common Cancers in Tianjin. 2023. [https://www.tj.gov.cn/sy/tjxw/202306/t20230612\\_6272938.html](https://www.tj.gov.cn/sy/tjxw/202306/t20230612_6272938.html) (accessed June 15, 2023).
9. Liaoning Cancer Hospital. Livelihood Programme for Colorectal Cancer Screening in Liaoning. 2022. <https://mp.weixin.qq.com/s/z5TtkKlqjF4-gMv-YchOVg> (accessed June 15, 2023).
10. Gong Y, Peng P, Bao P, et al. The Implementation and First-Round Results of a Community-Based Colorectal Cancer Screening Program in Shanghai, China. *Oncologist* 2018; **23**(8): 928-35.
11. Shanghai Municipal Health Commission. Community-Based Colorectal Cancer Screening Program in Shanghai. 2013. <https://wsjkw.sh.gov.cn/ygwj/20180525/0012-23713.html> (accessed June 15, 2023).
12. Fan X, Ding H, Lu S, et al. Study on compliance rate of colonoscopy among high-risk population of colorectal cancer in Jiangsu Province. *China Cancer* 2023; **32**(3): 202-8 (in Chinese).
13. Jiangsu Commission of Health. Comprehensive Cancer Screening Programme in Jiangsu - #0670 Rely. 2022. [https://jpschfp.jiangsu.gov.cn/art/2022/8/31/art\\_59524\\_10592808.html](https://jpschfp.jiangsu.gov.cn/art/2022/8/31/art_59524_10592808.html) (accessed June 15, 2023).
14. Jiangsu Commission of Health. Comprehensive Cancer Screening Programme in Jiangsu - #0831 Rely. 2022. [http://wjw.jiangsu.gov.cn/art/2022/8/31/art\\_59524\\_10592810.html](http://wjw.jiangsu.gov.cn/art/2022/8/31/art_59524_10592810.html) (accessed June 15, 2023).
15. Chinese Center for Disease Control and Prevention. Livelihood Project for Colorectal Cancer Screening in Yangzhou. 2021. [https://ncncd.chinaacc.cn/zxdt/202108/t20210803\\_232276.htm](https://ncncd.chinaacc.cn/zxdt/202108/t20210803_232276.htm) (accessed June 15, 2023).
16. Jiangsu Provincial Committee of the Communist Party of China. Livelihood Project for Colorectal Cancer Screening in Yangzhou. 2022. [http://www.zgjssw.gov.cn/shixianchuanzhen/yangzhou/202205/t20220531\\_7563549.shtml](http://www.zgjssw.gov.cn/shixianchuanzhen/yangzhou/202205/t20220531_7563549.shtml) (accessed June 15, 2023).
17. Zhu C, Gong W, Zhong J, et al. Zhejiang Colorectal Cancer Screening Program: Overview and Study Design. *China Cancer* 2020; **29**(12): 899-903 (in Chinese).
18. Health Commission of Zhejiang Province. Colorectal Cancer Screening Programme in Zhejiang. 2022. [https://wsjkw.zj.gov.cn/art/2022/8/23/art\\_1229129056\\_4970430.html](https://wsjkw.zj.gov.cn/art/2022/8/23/art_1229129056_4970430.html) (accessed June 15, 2023).
19. Taizhou Government. Gastric Cancer Screening programme among low-income population in Taizhou. 2021. [https://www.zjtz.gov.cn/art/2021/7/28/art\\_1229453634\\_3725882.html](https://www.zjtz.gov.cn/art/2021/7/28/art_1229453634_3725882.html) (accessed June 15, 2023).
20. Linhai Government. Gastric Cancer Screening programme among low-income population in Linhai of Taizhou. 2021. [http://www.linhai.gov.cn/art/2021/12/10/art\\_1454192\\_59025222.html](http://www.linhai.gov.cn/art/2021/12/10/art_1454192_59025222.html) (accessed June 15, 2023).
21. Wenling Government. Lung Cancer Screening Programme in Wenling. 2019. [http://www.wl.gov.cn/art/2019/4/25/art\\_1544431\\_33810273.html](http://www.wl.gov.cn/art/2019/4/25/art_1544431_33810273.html) (accessed June 15, 2023).
22. Health Commission of Lishui City. Gastric Cancer Screening Programme among low-income population in Lishui. 2019. [https://www.zjtz.gov.cn/art/2021/7/28/art\\_1229453634\\_3725882.html](https://www.zjtz.gov.cn/art/2021/7/28/art_1229453634_3725882.html) (accessed June 15, 2023).
23. Lishui News. Lung Cancer Screening Programme in Lishui. 2023. [https://www.lsol.com.cn/html/2023/minsheng\\_0405/601601.html](https://www.lsol.com.cn/html/2023/minsheng_0405/601601.html) (accessed June 15, 2023).
24. Wang B, Chai X, Lan L, et al. Cost-effectiveness Analysis of Colorectal Cancer Screening in Lanxi City of Zhejiang Province, 2018—2019. *China Cancer* 2020; **29**(12): 914-8 (in Chinese).
25. Lanxi Government. Colorectal Cancer Screening Programme among urban and rural residents in Lanxi. 2022. [http://www.lanxi.gov.cn/art/2018/3/22/art\\_1229432347\\_1702541.html](http://www.lanxi.gov.cn/art/2018/3/22/art_1229432347_1702541.html) (accessed June 15, 2023).
26. Yongkang Government. Gastrointestinal Cancer Screening Programme in Yongkang. 2020. [http://www.yk.gov.cn/art/2020/4/13/art\\_1229188655\\_1222830.html](http://www.yk.gov.cn/art/2020/4/13/art_1229188655_1222830.html) (accessed June 15, 2023).
27. Fenghua Government. Gastrointestinal Cancer Screening Programme in Fenghua. 2023.

- [http://www.fh.gov.cn/art/2023/1/5/art\\_1229560529\\_1761746.html](http://www.fh.gov.cn/art/2023/1/5/art_1229560529_1761746.html) (accessed June 15, 2023).
28. Health Bureau of Fenghua. Gastrointestinal Cancer Screening Programme in Fenghua. 2023. [http://www.fh.gov.cn/art/2023/3/16/art\\_1229106880\\_59112454.html](http://www.fh.gov.cn/art/2023/3/16/art_1229106880_59112454.html) (accessed June 15, 2023).
  29. The State Council. Five Cancer Screening Programme upon employee medical insurance in Jinan. 2019. [https://www.gov.cn/xinwen/2019-10/20/content\\_5442527.htm](https://www.gov.cn/xinwen/2019-10/20/content_5442527.htm) (accessed June 15, 2023).
  30. Shandong Government. Five Cancer Screening Programme upon employee medical insurance in Jinan. 2019. [http://www.shandong.gov.cn/art/2019/10/22/art\\_97564\\_289230.html](http://www.shandong.gov.cn/art/2019/10/22/art_97564_289230.html) (accessed June 15, 2023).
  31. People's Government of Weifang City. Colorectal Cancer Screening Programme among local residents in Weifeng. 2021. [http://www.weifang.gov.cn/ywdt/ztzl/rdzt/yhyshj/zxdt/202110/t20211020\\_5958601.html](http://www.weifang.gov.cn/ywdt/ztzl/rdzt/yhyshj/zxdt/202110/t20211020_5958601.html) (accessed June 15, 2023).
  32. Weihai Government. Gastric Cancer Screening Programme among rural residents in Weihai. 2021. [http://wsjkw.weihai.gov.cn/art/2021/3/5/art\\_29604\\_2539891.html](http://wsjkw.weihai.gov.cn/art/2021/3/5/art_29604_2539891.html) (accessed June 15, 2023).
  33. Binzhou Healthcare Security Administration. Five Cancer Screening Programme upon employee medical insurance in Binzhou. 2020. [http://yb.binzhou.gov.cn/art/2020/5/12/art\\_119409\\_9095140.html](http://yb.binzhou.gov.cn/art/2020/5/12/art_119409_9095140.html) (accessed June 15, 2023).
  34. Wuhan Municipal Health Commission. Free Screening Program for Colorectal Cancer in Wuhan. 2021. [http://wjw.wuhan.gov.cn/gsgg/202110/t20211021\\_1816527.shtml](http://wjw.wuhan.gov.cn/gsgg/202110/t20211021_1816527.shtml) (accessed June 15, 2023).
  35. Health Commission of Hubei Province. Free Screening Programme for Lung Cancer in Hubei. 2023. [https://wjw.hubei.gov.cn/bmdt/mtjj/mtgz/202305/t20230531\\_4686861.shtml](https://wjw.hubei.gov.cn/bmdt/mtjj/mtgz/202305/t20230531_4686861.shtml) (accessed June 15, 2023).
  36. People's Government of Hunan Province. Lung Cancer Screening Programme in Hunan. 2021. [http://www.hunan.gov.cn/hnszf/hnyw/zwdt/202108/t20210818\\_20372083.html](http://www.hunan.gov.cn/hnszf/hnyw/zwdt/202108/t20210818_20372083.html) (accessed June 15, 2023).
  37. People's Government of Hunan Province. Lung Cancer Screening Programme in Hunan. 2022. [https://www.hunan.gov.cn/hnszf/hnyw/zwdt/202205/t20220521\\_24623519.html](https://www.hunan.gov.cn/hnszf/hnyw/zwdt/202205/t20220521_24623519.html) (accessed June 15, 2023).
  38. People's Government of Hunan Province. Colorectal Cancer Screening Programme in Hunan. 2022. [https://www.hunan.gov.cn/hnszf/hnyw/zwdt/202205/t20220521\\_24623519.html](https://www.hunan.gov.cn/hnszf/hnyw/zwdt/202205/t20220521_24623519.html) (accessed June 15, 2023).
  39. Health Commission of Hunan Province. Colorectal Cancer Screening Programme in Hunan. 2022. [http://wjw.hunan.gov.cn/xxgk/gzdt/szdt/202205/t20220518\\_24620079.html](http://wjw.hunan.gov.cn/xxgk/gzdt/szdt/202205/t20220518_24620079.html) (accessed June 15, 2023).
  40. Lin G, Feng Z, Liu H, et al. Mass screening for colorectal cancer in a population of two million older adults in Guangzhou, China. *Sci Rep* 2019; **9**(1): 10424.
  41. Zhou Q, Shen J, Liu H, Lin G, Li Y. The Practice Research of colorectal cancer screening program in community population of Guangzhou City. *China Cancer* 2016; **25**(6): 418-21 (in Chinese).
  42. Guangzhou Municipal Health Commission. Colorectal Cancer Screening Programme in Community Population in Guangzhou. 2017. [http://wjw.gz.gov.cn/xxgk/shgysyjs/content/post\\_2431302.html](http://wjw.gz.gov.cn/xxgk/shgysyjs/content/post_2431302.html) (accessed June 15, 2023).
  43. Guangzhou Municipal Health Commission. Pilot Screening Programme for High-Risk Populations of Lung Cancer in Guangzhou. 2017. [http://wjw.gz.gov.cn/xxgk/zfxgkml/zfxgkml/gzdt/content/post\\_4270957.html](http://wjw.gz.gov.cn/xxgk/zfxgkml/zfxgkml/gzdt/content/post_4270957.html) (accessed June 15, 2023).
  44. Health Commission of Shenzhen Municipality. Colorectal Cancer Screening Programme in community population in Shenzhen. 2020. [http://wjw.sz.gov.cn/xxgk/zjxx/zxgjxx/content/post\\_8388156.html](http://wjw.sz.gov.cn/xxgk/zjxx/zxgjxx/content/post_8388156.html) (accessed June 15, 2023).
  45. Health Commission of Shenzhen Municipality. Colorectal Cancer Screening Programme in community population in Shenzhen. 2021. <http://wjw.sz.gov.cn/attachment/1/1201/1201954/9426160.pdf> (accessed June 15, 2023).
  46. The State Council. Nasopharyngeal Carcinoma and Liver Cancer Screening Programme in Guangxi. 2018. [https://www.gov.cn/xinwen/2018-01/01/content\\_5252168.htm](https://www.gov.cn/xinwen/2018-01/01/content_5252168.htm) (accessed June 15, 2023).
  47. Guangxi Center for Disease Control and Prevention. Nasopharyngeal Carcinoma and Liver Cancer Screening Programme in Guangxi. 2016. <https://www.gxcdc.com/index.php?m=special&c=index&a=show&id=5093> (accessed June 15, 2023).
  48. Li N, Tan F, Chen W, et al. One-off low-dose CT for lung cancer screening in China: a multicentre, population-based, prospective cohort study. *Lancet Respir Med* 2022; **10**(4): 378-91.
  49. Dai J, Lv J, Zhu M, et al. Identification of risk loci and a polygenic risk score for lung cancer: a large-scale prospective cohort study in Chinese populations. *Lancet Respir Med* 2019; **7**(10): 881-91.
  50. Qin N, Wang C, Chen C, et al. Association of the interaction between mosaic chromosomal alterations and polygenic risk score with the risk of lung cancer: an array-based case-control association and prospective cohort study. *Lancet Oncol* 2022; **23**(11): 1465-74.
  51. Jin P, Yao S, Qiao Y, et al. Study on sputum cytology of lung cancer among Yunnan tin miners from 1992 to 1997. *Chin J Lung Cancer* 2001; **4**(3): 223-6 (in Chinese).
  52. Fan YG, Hu P, Jiang Y, et al. Association between sputum atypia and lung cancer risk in an occupational cohort in Yunnan, China. *Chest* 2009; **135**(3): 778-85.
  53. Zeng H, Cao M, Xia C, et al. Performance and effectiveness of hepatocellular carcinoma screening in individuals

- with HBsAg seropositivity in China: a multi-center prospective study. *Nature Cancer* 2023.
54. Wu CY, Hsu YC, Ho HJ, Chen YJ, Lee TY, Lin JT. Association between ultrasonography screening and mortality in patients with hepatocellular carcinoma: a nationwide cohort study. *Gut* 2016; **65**(4): 693-701.
  55. Zhang BH, Yang BH, Tang ZY. Randomized controlled trial of screening for hepatocellular carcinoma. *J Cancer Res Clin Oncol* 2004; **130**(7): 417-22.
  56. Zhu YR. AFP sero-survey and early diagnosis of liver cell cancer in the Qidong field. *Chin J Oncol* 1981; **3**(1): 35-8 (in Chinese).
  57. Chen H, Shi J, Lu M, et al. Comparison of Colonoscopy, Fecal Immunochemical Test, and Risk-Adapted Approach in a Colorectal Cancer Screening Trial (TARGET-C). *Clin Gastroenterol Hepatol* 2022.
  58. Wang P, Berzin TM, Glissen Brown JR, et al. Real-time automatic detection system increases colonoscopic polyp and adenoma detection rates: a prospective randomised controlled study. *Gut* 2019; **68**(10): 1813-9.
  59. Wang P, Liu X, Berzin TM, et al. Effect of a deep-learning computer-aided detection system on adenoma detection during colonoscopy (CADE-DB trial): a double-blind randomised study. *Lancet Gastroenterol Hepatol* 2020; **5**(4): 343-51.
  60. Zheng S, Chen K, Liu X, et al. Cluster randomization trial of sequence mass screening for colorectal cancer. *Dis Colon Rectum* 2003; **46**(1): 51-8.
  61. Chen R, Liu Y, Song G, et al. Effectiveness of one-time endoscopic screening programme in prevention of upper gastrointestinal cancer in China: a multicentre population-based cohort study. *Gut* 2021; **70**(2): 251-60.
  62. Jin G, Lv J, Yang M, et al. Genetic risk, incident gastric cancer, and healthy lifestyle: a meta-analysis of genome-wide association studies and prospective cohort study. *Lancet Oncol* 2020; **21**(10): 1378-86.
  63. Luo H, Xu G, Li C, et al. Real-time artificial intelligence for detection of upper gastrointestinal cancer by endoscopy: a multicentre, case-control, diagnostic study. *Lancet Oncol* 2019; **20**(12): 1645-54.
  64. Wei WQ, Chen ZF, He YT, et al. Long-Term Follow-Up of a Community Assignment, One-Time Endoscopic Screening Study of Esophageal Cancer in China. *J Clin Oncol* 2015; **33**(17): 1951-7.
  65. Liu SF, Shen Q, Dawsey SM, et al. Esophageal balloon cytology and subsequent risk of esophageal and gastric-cardia cancer in a high-risk Chinese population. *Int J Cancer* 1994; **57**(6): 775-80.
  66. Dawsey SM, Yu Y, Taylor PR, et al. Esophageal cytology and subsequent risk of esophageal cancer. A prospective follow-up study from Linxian, China. *Acta Cytol* 1994; **38**(2): 183-92.
  67. Shen S, Zhou Y, Xu Y, et al. A multi-centre randomised trial comparing ultrasound vs mammography for screening breast cancer in high-risk Chinese women. *Br J Cancer* 2015; **112**(6): 998-1004.
  68. Thomas DB, Gao DL, Self SG, et al. Randomized trial of breast self-examination in Shanghai: methodology and preliminary results. *J Natl Cancer Inst* 1997; **89**(5): 355-65.
  69. Thomas DB, Gao DL, Ray RM, et al. Randomized trial of breast self-examination in Shanghai: final results. *J Natl Cancer Inst* 2002; **94**(19): 1445-57.
  70. Zhang J, Zhao Y, Dai Y, et al. Effectiveness of high-risk human papillomavirus testing for cervical cancer screening in China: A multicenter, open-label, randomized clinical trial. *JAMA Oncol* 2021; **7**(2): 263-70.
  71. Pan QJ, Hu SY, Zhang X, et al. Pooled analysis of the performance of liquid-based cytology in population-based cervical cancer screening studies in China. *Cancer Cytopathol* 2013; **121**(9): 473-82.
  72. Zhao FH, Lewkowitz AK, Chen F, et al. Pooled analysis of a self-sampling HPV DNA Test as a cervical cancer primary screening method. *J Natl Cancer Inst* 2012; **104**(3): 178-88.
  73. Zhao FH, Lin MJ, Chen F, et al. Performance of high-risk human papillomavirus DNA testing as a primary screen for cervical cancer: a pooled analysis of individual patient data from 17 population-based studies from China. *Lancet Oncol* 2010; **11**(12): 1160-71.
  74. Qiao YL, Sellors JW, Eder PS, et al. A new HPV-DNA test for cervical-cancer screening in developing regions: a cross-sectional study of clinical accuracy in rural China. *Lancet Oncol* 2008; **9**(10): 929-36.
  75. He YQ, Wang TM, Ji M, et al. A polygenic risk score for nasopharyngeal carcinoma shows potential for risk stratification and personalized screening. *Nat Commun* 2022; **13**(1): 1966.
  76. Ji MF, Sheng W, Cheng WM, et al. Incidence and mortality of nasopharyngeal carcinoma: interim analysis of a cluster randomized controlled screening trial (PRO-NPC-001) in southern China. *Ann Oncol* 2019; **30**(10): 1630-7.
  77. Chan KCA, Woo JKS, King A, et al. Analysis of Plasma Epstein-Barr Virus DNA to Screen for Nasopharyngeal Cancer. *N Engl J Med* 2017; **377**(6): 513-22.
  78. Huang T, Wang H, Li J, et al. Screening program for nasopharyngeal carcinoma (NPC) - early detection for NPC. *Chinese Journal of Cancer* 1997; **16**(4): 245-7 (in Chinese).
  79. Deng H, Zeng Y, Liang J, et al. The basic screening project in 488 683 persons for nasopharyngeal carcinoma. *Tumor* 2005; **25**(2): 152-4 (in Chinese).
